# Supplementary material for: Development and characterization of an animal model of Japanese encephalitis virus infection in adolescent C57BL/6 mouse
Source: Oxford University Press journal article supplement (doi:10.1242/dmm.049176), 2021-08-27
Supplement: dmm049176supp.pdf [file dmm049176supp.pdf]

**A**

Pathways associated with upregulated proteins (Fold change  $\geq 2.0$ )

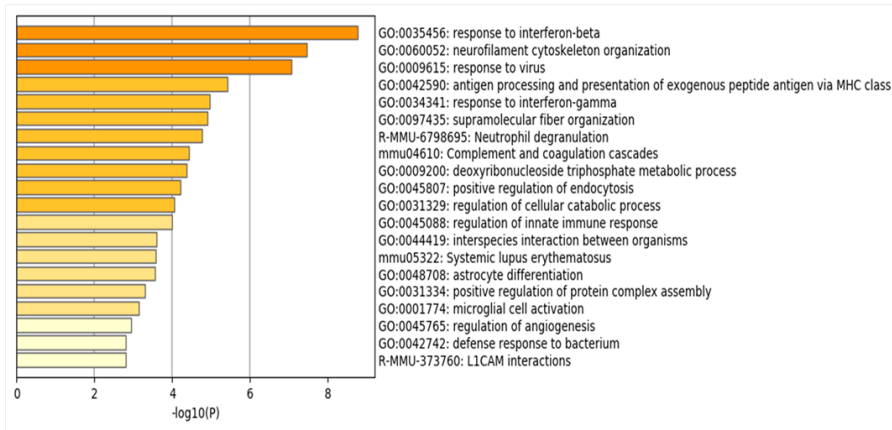

Pathways associated with downregulated proteins (Fold change  $\leq 0.5$ )

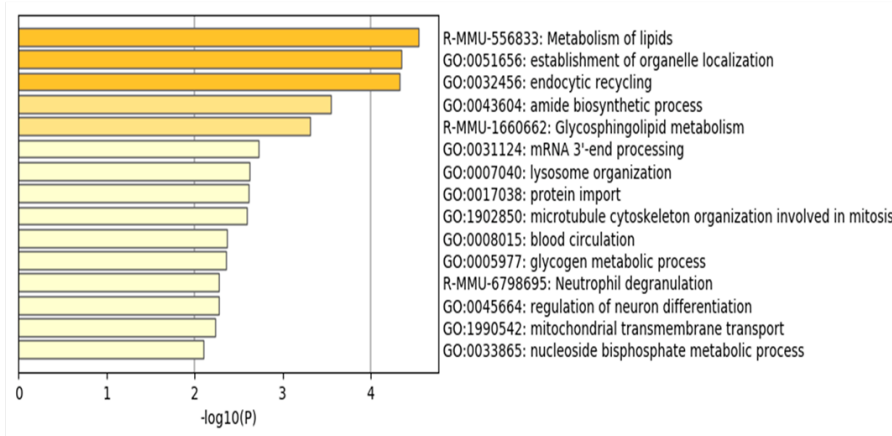

**B**

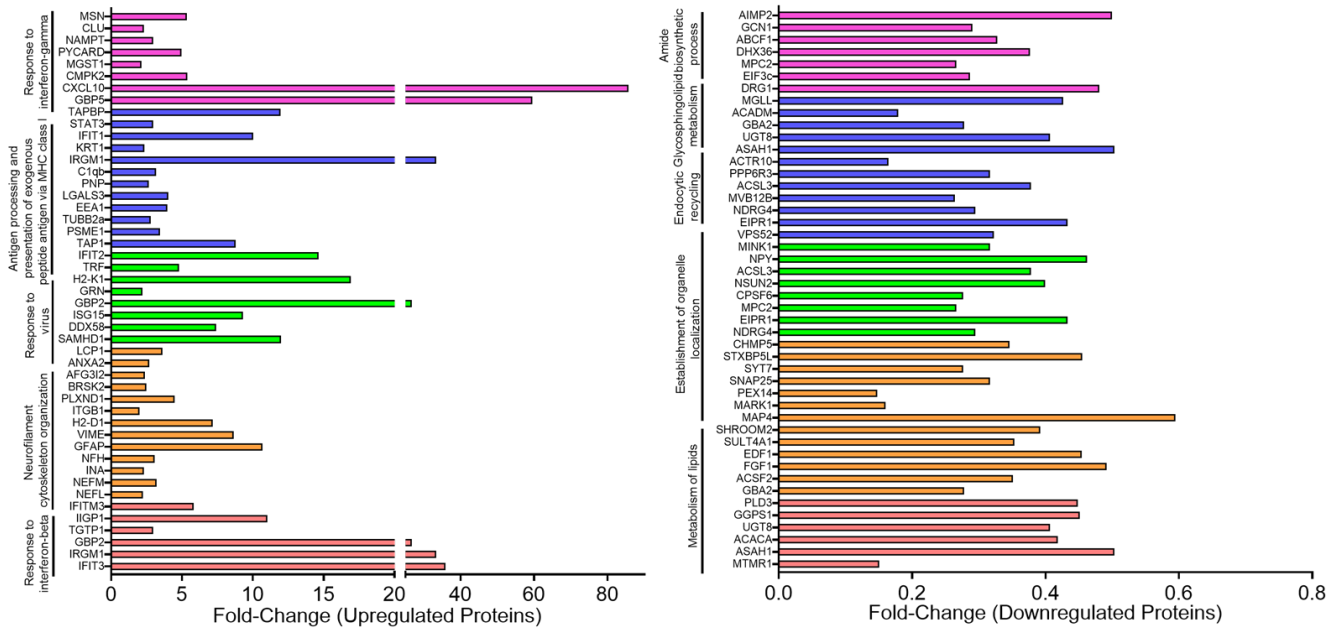

**Fig. S1. Proteins dysregulated in JEV-infected mouse brain.** C57BL/6 mice (3-4 weeks, n=3) were mock-infected or injected IP with 100  $\mu$ l JEV-S3 ( $10^7$  pfu). Mice were sacrificed and brain tissue harvested on day six when clinical symptoms became apparent. Protein lysates of the brain tissue were prepared to perform quantitative proteome analysis. Pathway enrichment of proteome profile was carried out by Metascape software. (A) Pathways associated with upregulated and downregulated proteins are shown. (B) The bar plots show fold-change in the expression of different proteins associated with upregulated (fold-change  $\geq 2$ ) and downregulated (fold-change  $\leq 0.5$ ) pathways. IP= Intraperitoneal

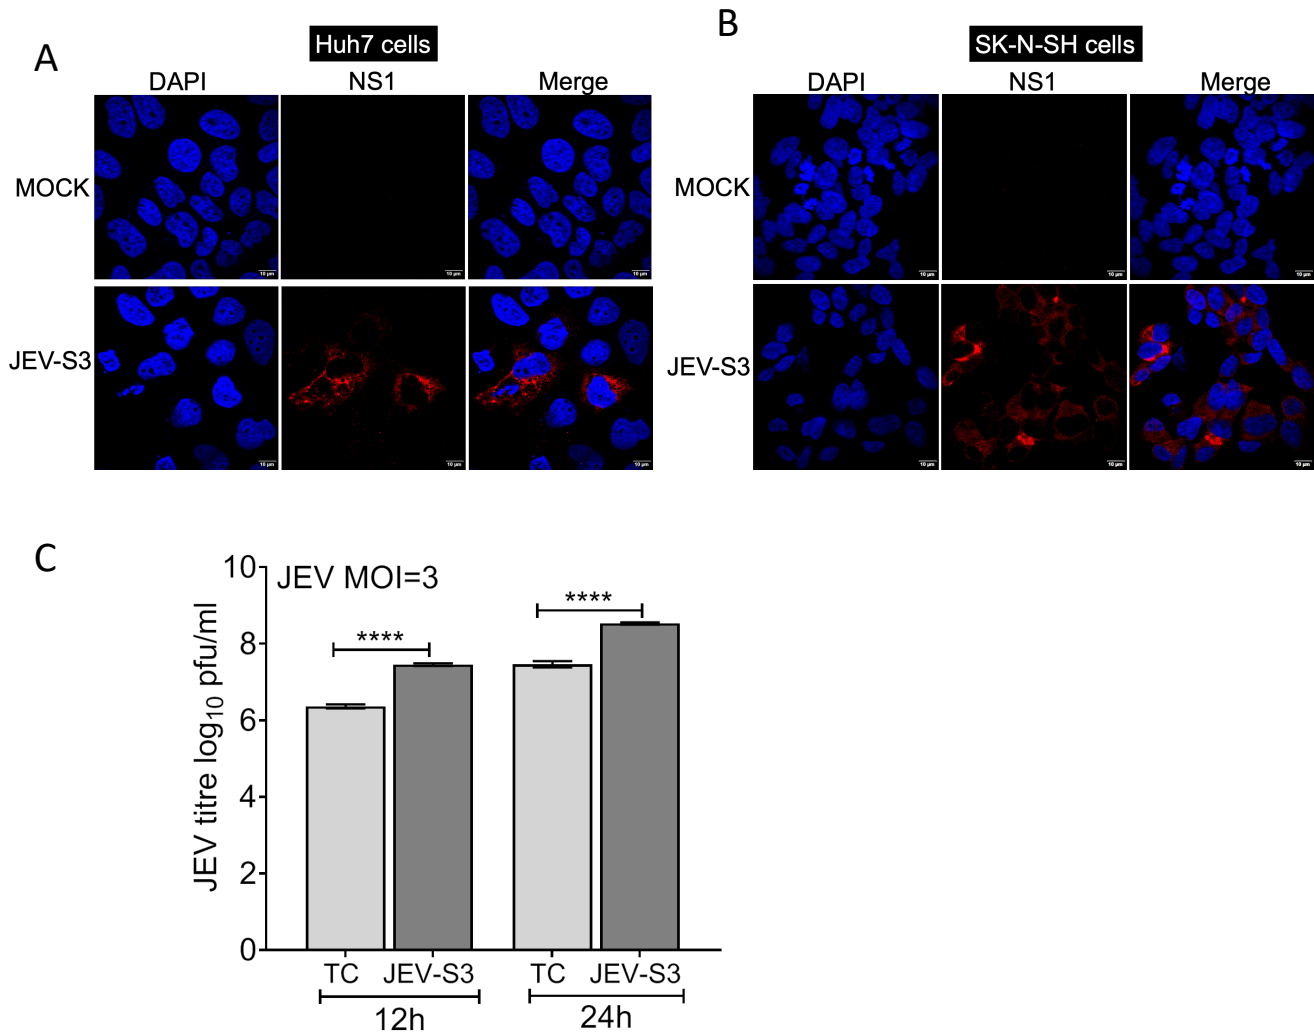

**Fig. S2. Infection of human cells with JEV-S3 virus.** (A) Huh7 and SK-N-SH cells infected with JEV-S3 at MOI=3, were stained for JEV antigen (NS1, red) and DAPI (Nucleus, blue) 24h post-infection. (B) The SK-N-SH cells were infected with either Tissue culture (TC) grown virus or JEV-S3 virus at MOI=3. The cell culture supernatant was collected at 12, and 24 h post infection. The virus titre in the supernatant was measured by the plaque assay performed in BHK cells. The bars depict mean  $\pm$  SD of three independent experiments performed in duplicate.(\*\*\*\* $p < 0.0001$ ).

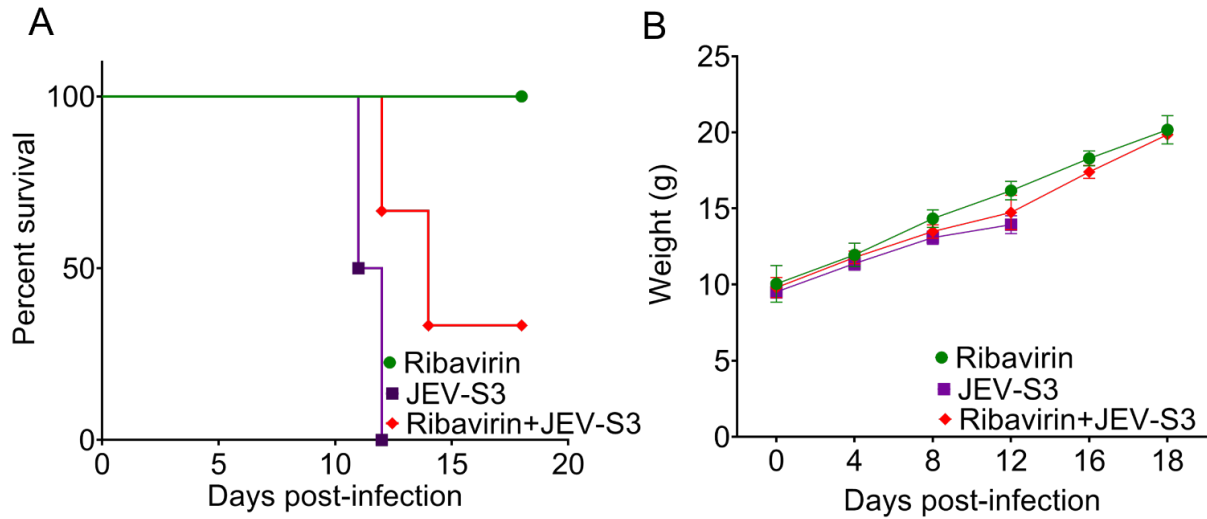

**Fig. S3. Antiviral activity of Ribavirin in the JEV mouse model.** C57BL/6 (3-4weeks old) mice of either sex were randomly divided into three groups (6 mice in each group). Mice in JEV-S3 and Ribavirin+JEV-S3 group were injected IP with 100  $\mu$ l JEV-S3 ( $10^7$  pfu). Ribavirin and Ribavirin+JEV-S3 groups were treated with ribavirin given IP (dose 30 mg/kg) 24 h pi with one dose each day for 7 days. The mortality was recorded. The Kaplan-Meier survival curves of mice with or without Ribavirin treatment are shown in the left panel. The body weight of mice of different experimental groups is shown in the right panel.

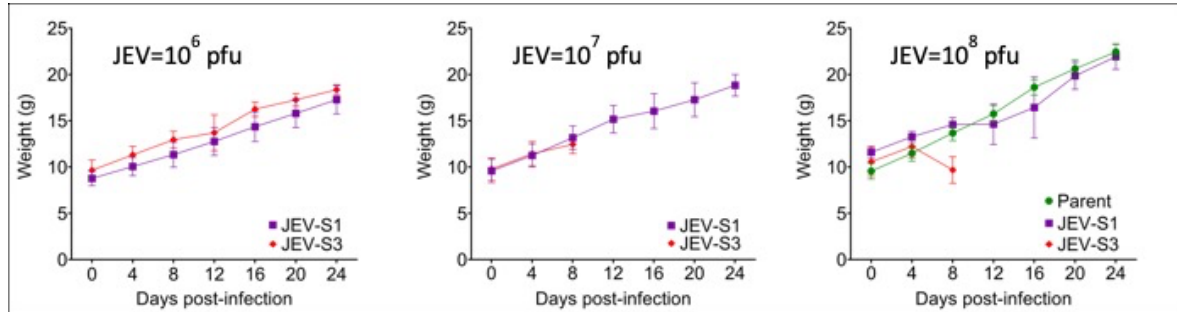

**Fig. S4. Body weights of mice infected with different doses of virus.** C57BL/6 mice (3-4 weeks) were inoculated IP with 100  $\mu$ l JEV-S1 or S3 ( $10^8$ – $10^6$  pfu) (12 mice in each group) and scored for the JE clinical signs and body weight each day. The below panels show the body weight of the virus-infected animals. PI= Intraperitoneal
